# Supplementary material
Source: publisher figshare collection journal article supplement (https://future-science-group.figshare.com/articles/dataset/_/20088260)
Supplement: Supplementary file 1 [file 1]

**Supplementary Table 2.** Response to treatment in patients with calcification.

| **Total evaluated** | **Baseline calcification** | | **Calcification increased in number** | |
| --- | --- | --- | --- | --- |
|  | **Yes 5(16.1)** | **No 26(83.9)** | **Yes 9(29.0)** | **No 22(71.0)** |
| CR | 0(0.0) | 1(3.8) | 1(11.1) | 0(0.0) |
| PR | 2(40.0) | 16(61.5) | 5(55.6) | 13(59.1) |
| SD | 1(20.0) | 5(19.2) | 2(22.2) | 4(18.2) |
| PD | 2(40.0) | 4(15.4) | 1(11.1) | 5(22.7) |
| Objective response | 2(40.0） | 17(65.4) | 6(66.7) | 13(59.1) |
| Clinical benefit | 3(60.0) | 22(84.6) | 8(88.9) | 17(77.3) |

**Abbreviations CR:** Complete response; **PR:** Partial response; **SD:** Stable disease; **PD:** Progressive disease

**Note:** Patients with a CR, PR, SD or PD at any time during the study.
